# Supplementary material
Source: PubMed Central journal article supplement (PMC3547491)
Supplement: cn300165x_si_001.pdf [file cn300165x_si_001.pdf]

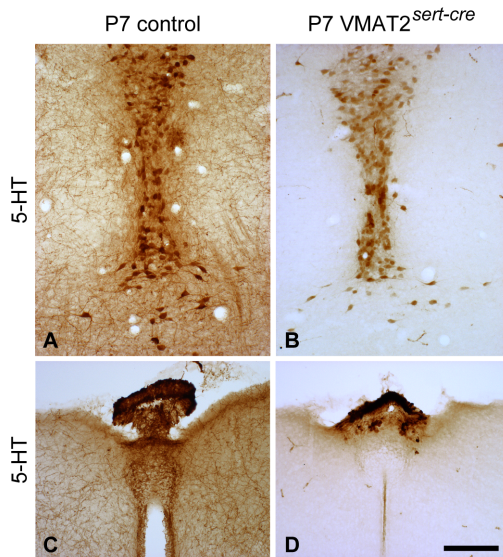

**Supplementary Figure 1. Residual 5-HT in VMAT2<sup>sert-cre</sup> mice.**  
 Control and VMAT2<sup>sert-cre</sup> littermates were perfused at P7 and 50  $\mu$ m-thick coronal sections were labeled with 5-HT antibodies and revealed with DAB. A,B) In the raphe, 5-HT immunolabeling is completely absent in the axons and neuropil, while faint residual staining persists in the cell soma.  
 C,D) In pinealocytes, 5-HT immunostaining remains strong in mutants, but neighboring raphe axons and neuropil are depleted.  
 Scale bar = 100  $\mu$ m.

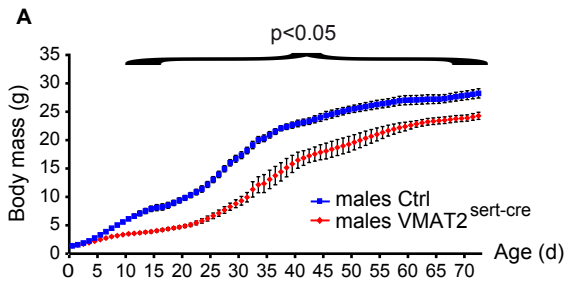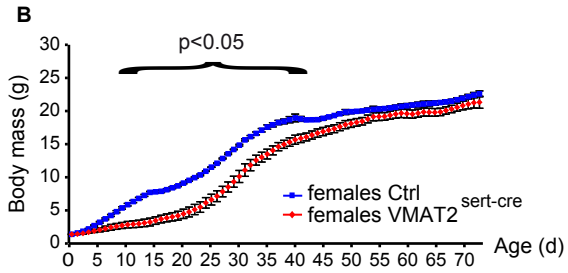

**Supplementary Figure 2. Gender differences in growth rates in VMAT2<sup>sert-cre</sup> mice**

Mean growth curves from 11 VMAT2<sup>sert-cre</sup> (red diamonds) and 7 control male mice (blue squares) (A) and 7 VMAT2<sup>sert-cre</sup> (red diamonds) and 7 control female mice (blue squares) (B) from 6 different litters. The growth of the VMAT2<sup>sert-cre</sup> mice was significantly different from that of control mice from P11 to P75 for males, and from P9 to P41 for females (ANOVA p<0.05).

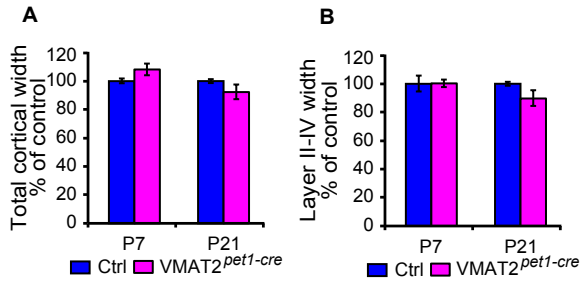

**Supplementary Figure 3: Cortical growth in VMAT2<sup>pet1-cre</sup> mice**

A,B) The cerebral cortex of VMAT2<sup>pet1-cre</sup> mice was measured at P7 (n=4 controls and 5 VMAT2<sup>pet1-cre</sup>) for total (A) or superficial layers (B) thickness in the somatosensory cortex. No difference was found between control and recombined animals (Student test). Measures from P21 brains (n=4 for each genotype) are show no difference as well. Values are expressed as % of control values.
